# Supplementary material for: Structural basis of peptide recognition and activation of endothelin receptors
Source: PubMed Central journal article supplement (PMC9992518; doi:10.1038/s41467-023-36998-9), 2023-03-07
Supplement: 41467_2023_36998_MOESM1_ESM.pdf [file 41467_2023_36998_MOESM1_ESM.pdf]

## Supplementary Information

### Structural basis of peptide recognition and activation of endothelin receptors

Yujie Ji<sup>1,2,\*</sup>, Jia Duan<sup>1,2,\*,#</sup>, Qingning Yuan<sup>1,\*</sup>, Xinheng He<sup>1,2</sup>, Gong Yang<sup>3</sup>, Shengnan Zhu<sup>4</sup>, Kai Wu<sup>1</sup>, Wen Hu<sup>1</sup>, Tianyu Gao<sup>5</sup>, Xi Cheng<sup>6</sup>, Hualiang Jiang<sup>2,5,6,7</sup>, H. Eric Xu<sup>1,2,5,6,#</sup>, Yi Jiang<sup>5,7,#</sup>

<sup>1</sup> The CAS Key Laboratory of Receptor Research, Shanghai Institute of Materia Medica, Chinese Academy of Sciences, Shanghai 201203, China

<sup>2</sup> University of Chinese Academy of Sciences, Beijing 100049, China

<sup>3</sup> State Key Laboratory of Cellular Stress Biology, School of Life Sciences, Xiamen University, Fujian 361005, China

<sup>4</sup> School of Pharmacy, Macau University of Science and Technology, Macau 999078, China

<sup>5</sup> School of Life Science and Technology, ShanghaiTech University, Shanghai 201210, China

<sup>6</sup> State Key Laboratory of Drug Research, Shanghai Institute of Materia Medica, Chinese Academy of Sciences, Shanghai 201203, China

<sup>7</sup> Lingang Laboratory, Shanghai 200031, China

# Co-corresponding authors:

H.E.X., email: eric.xu@simm.ac.cn,

J. D., email: duanjia@simm.ac.cn

Y. J., email: yjiang@lglab.ac.cn

\* These authors contributed equally to this work.

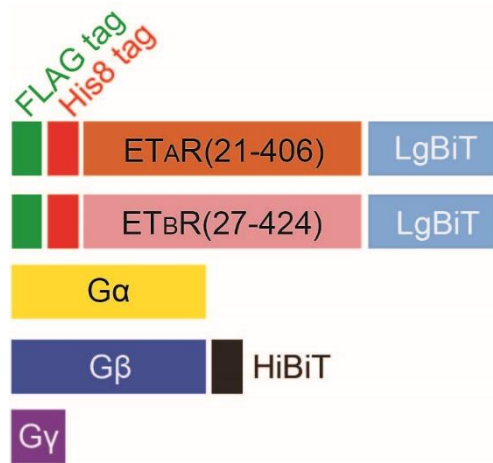

**Fig. S1 Engineered constructs used for expression of ET<sub>A</sub>R/ET<sub>B</sub>R-G protein complexes.**

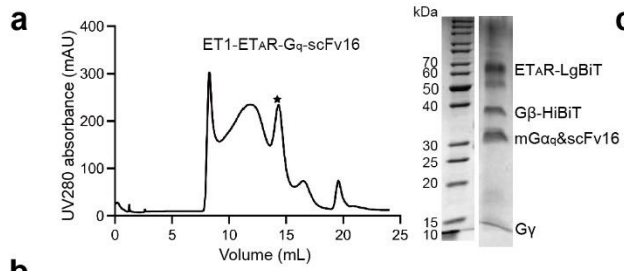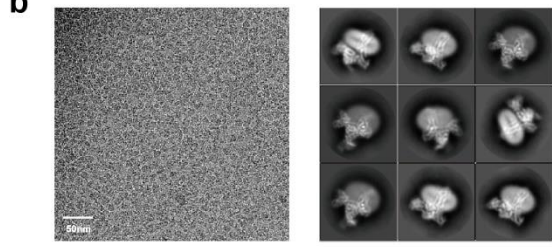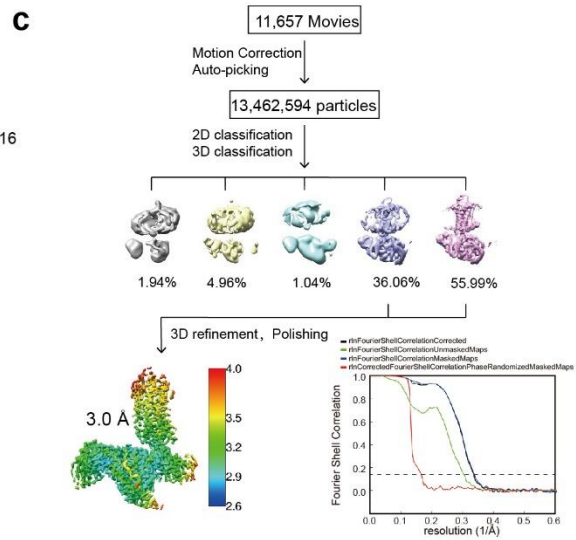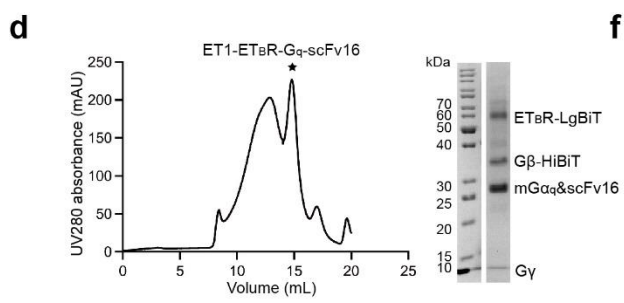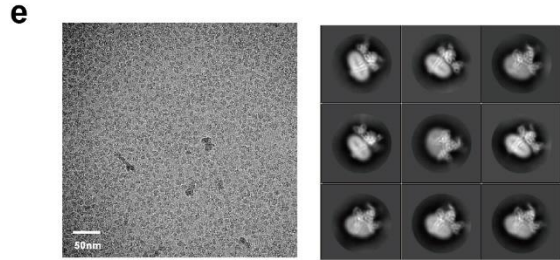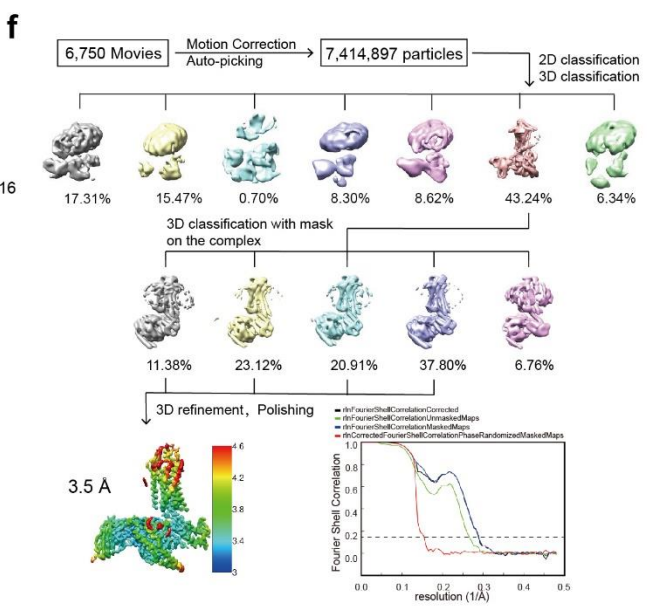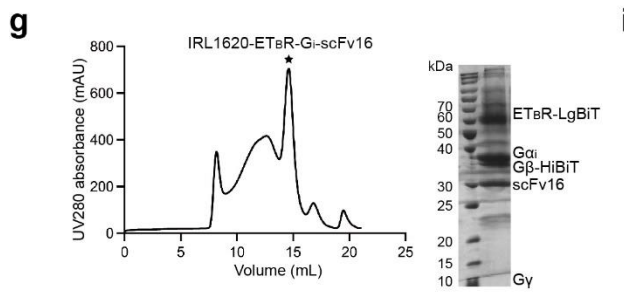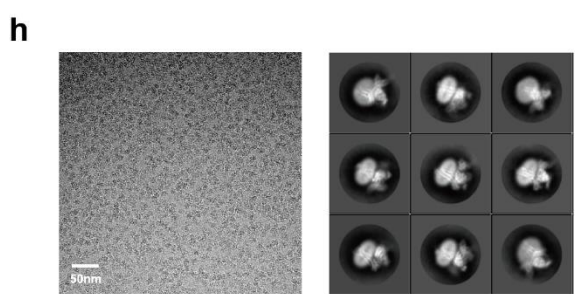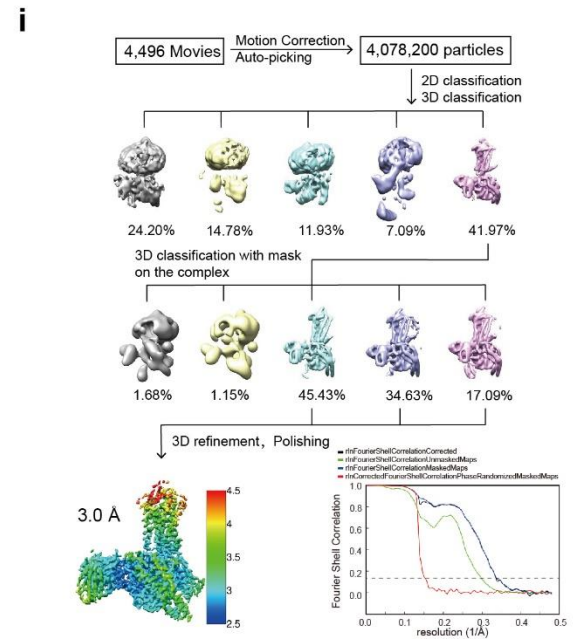

**Fig. S2 The ET-1-ET<sub>A</sub>R-G<sub>q</sub>-scFv16, ET-1-ET<sub>B</sub>R-G<sub>q</sub>-scFv16, and IRL1620-ET<sub>B</sub>R-G<sub>i</sub>-scFv16 complexes purification and cryo-EM data processing.** **a, d, g** Representative elution profile and SDS-PAGE analysis of the ET-1-ET<sub>A</sub>R-G<sub>q</sub>-scFv16 (**a**), ET-1-ET<sub>B</sub>R-G<sub>q</sub>-scFv16 (**d**) and IRL1620-ET<sub>B</sub>R-G<sub>i</sub>-scFv16 complexes (**g**). Black asterisks denote the monomer of three complexes. **b, e, h** Cryo-EM micrographs and reference-free 2D class averages of the ET-1-ET<sub>A</sub>R-G<sub>q</sub>-scFv16 (**b**), ET-1-ET<sub>B</sub>R-G<sub>q</sub>-scFv16 (**e**) and IRL1620-ET<sub>B</sub>R-G<sub>i</sub>-scFv16 complexes (**h**). The complex purification and data collection was performed once. Source data are provided as a Source Data file. **c, f, i** Flow chart of the cryo-EM data processing for the ET-1-ET<sub>A</sub>R-G<sub>q</sub>-scFv16 (**c**), ET-1-ET<sub>B</sub>R-G<sub>q</sub>-scFv16 (**f**) and IRL1620-ET<sub>B</sub>R-G<sub>i</sub>-scFv16 complexes (**i**). The “Gold-standard” Fourier shell correlation (FSC) curve indicates that the overall resolution of the electron density map of the ET-1-ET<sub>A</sub>R-G<sub>q</sub>-scFv16 complex is 3.0 Å, the ET-1-ET<sub>B</sub>R-G<sub>q</sub>-scFv16 complex is 3.5 Å, and the IRL1620-ET<sub>B</sub>R-G<sub>i</sub>-scFv16 complex is 3.0 Å.

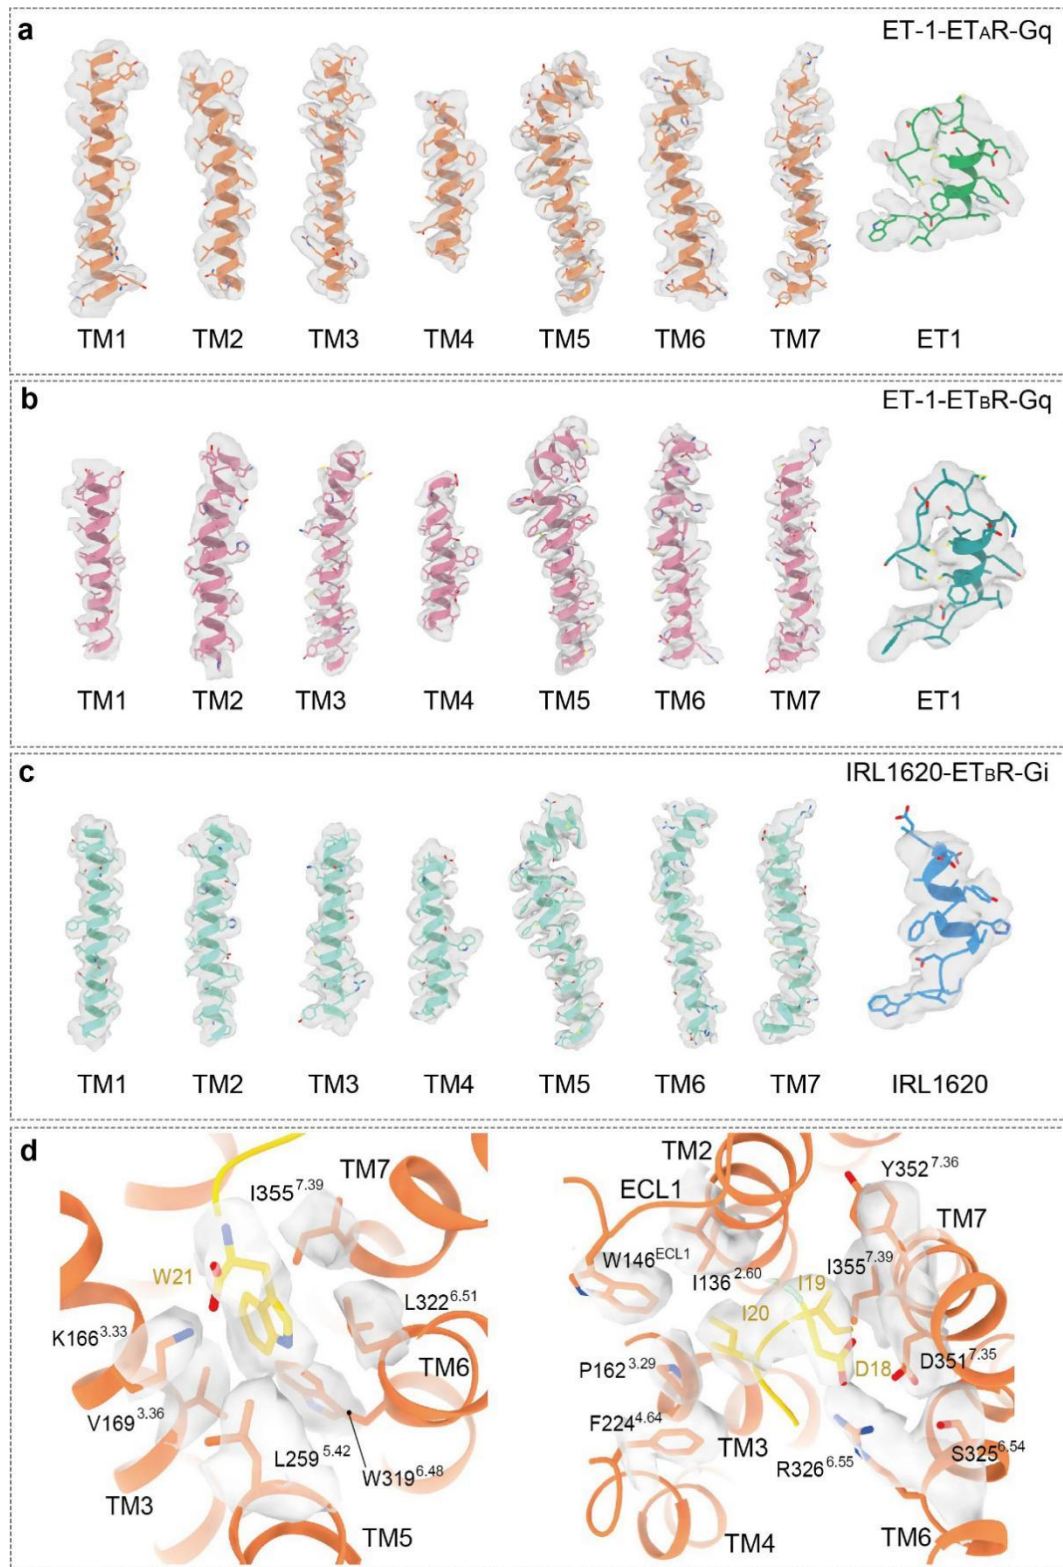

**Fig. S3** Representative EM density and coordinate of the ET-1-ET<sub>A</sub>R-G<sub>q</sub>-scFv16, ET-1-ET<sub>B</sub>R-G<sub>q</sub>-scFv16 and IRL1620-ET<sub>B</sub>R-G<sub>i</sub>-scFv16 complexes. EM density and model of ET-1-ET<sub>A</sub>R-G<sub>q</sub> (a), ET-1-ET<sub>B</sub>R-G<sub>q</sub> (b), IRL1620-ET<sub>B</sub>R-G<sub>i</sub> complexes (c), and key ET<sub>A</sub>R residues in the binding site of the ET-1 C-terminus (d).

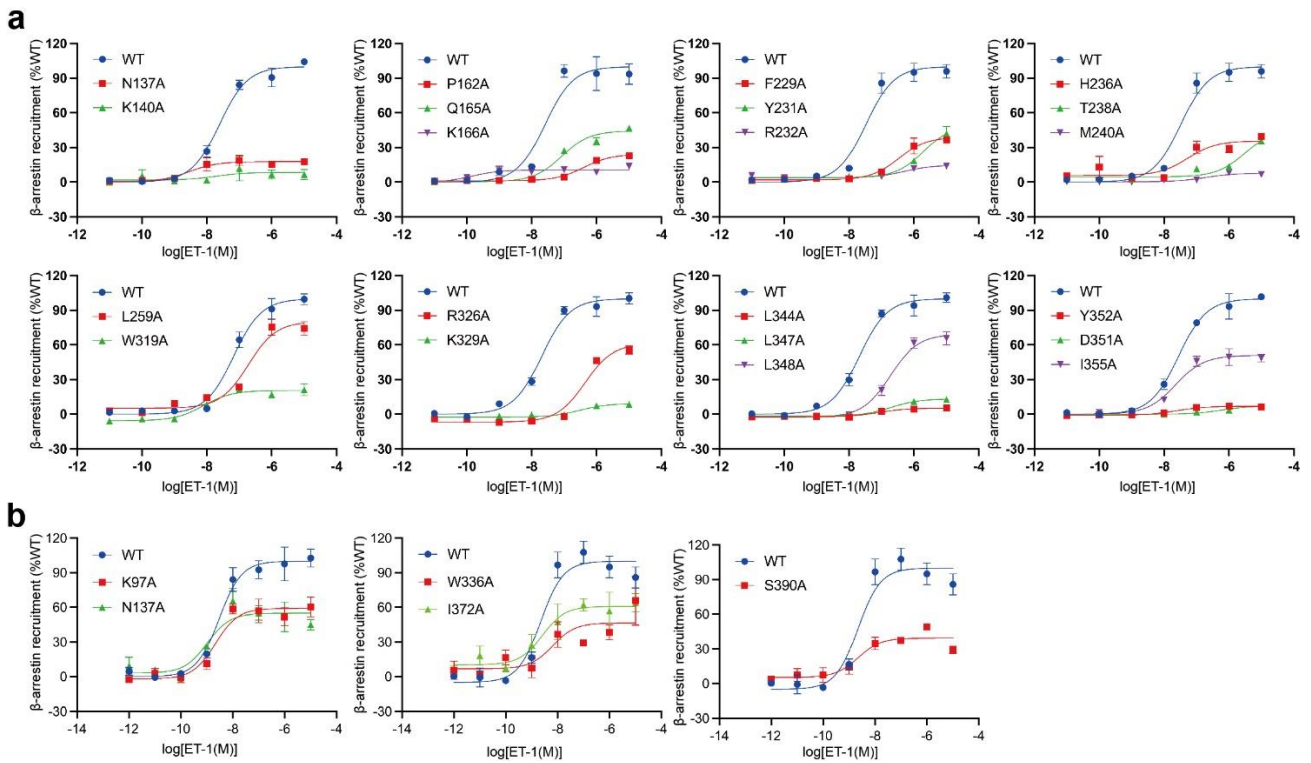

**Fig. S4 ET-1 response curves on WT and mutant ET<sub>A</sub>R/ET<sub>B</sub>R.** WT or mutant ET<sub>A</sub>R (a) or ET<sub>B</sub>R (b) were transfected into AD293 cells and β-arrestin recruitment signals were measured to reflect the activity of ET-1. The response data was normalized by WT receptor within each individual experiment, with the basal activity for WT as 0, while the fitted  $E_{max}$  of WT as 100. Three independent experiments were conducted (n=3). The representative concentration-response curves were shown. Source data are provided as a Source Data file.

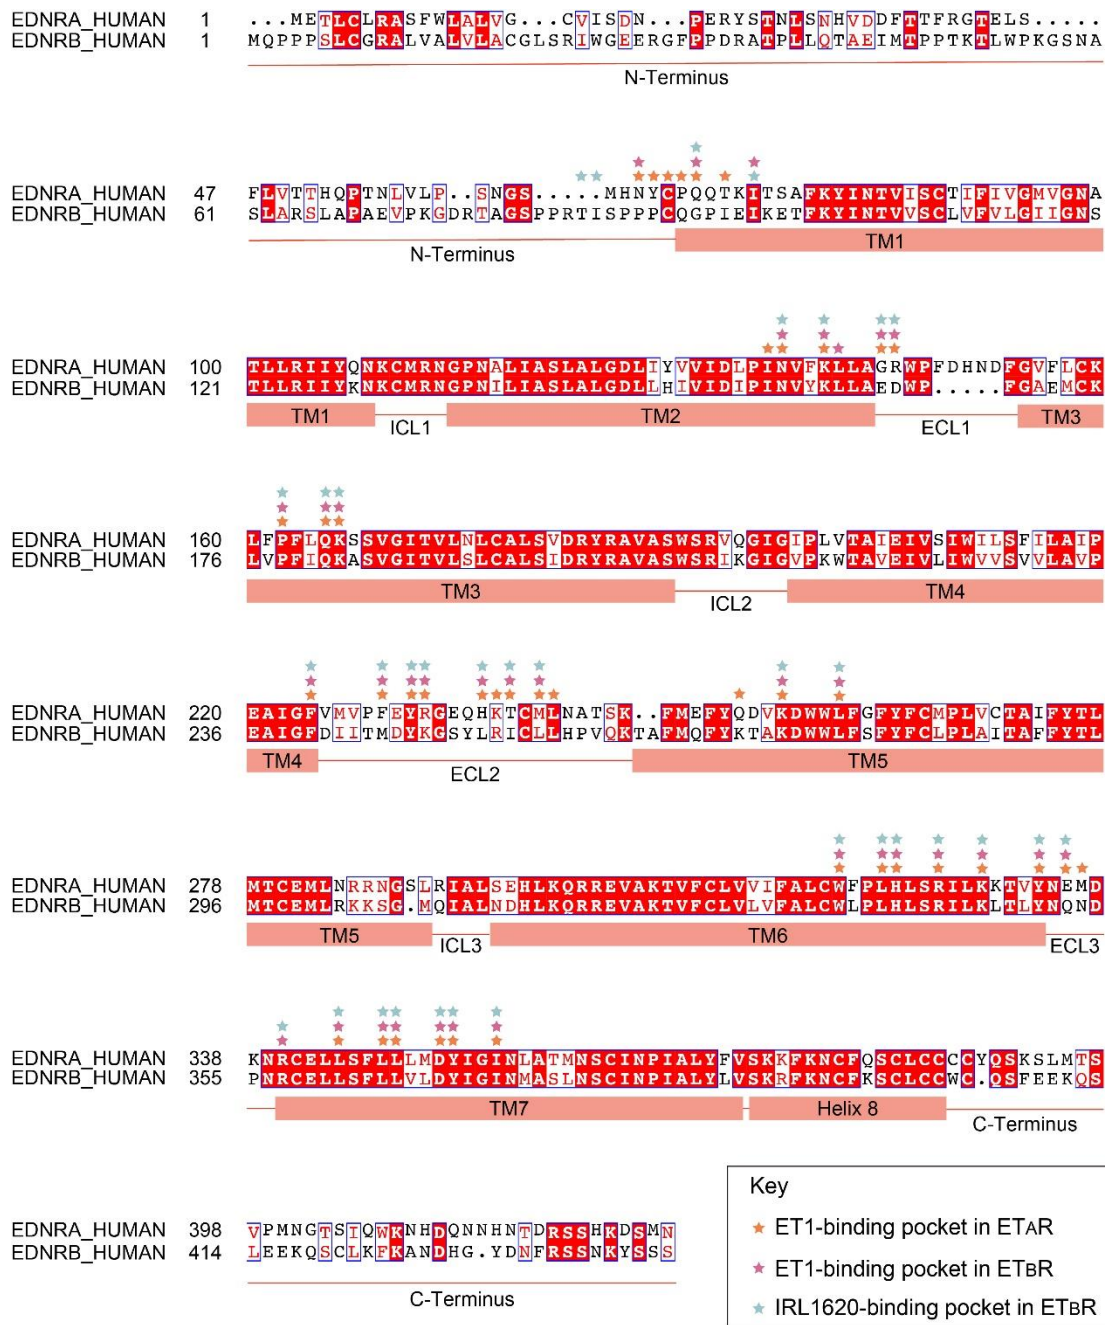

**Fig. S5 Sequence alignment of the ETRs.** The sequence alignment of ET<sub>A</sub>R and ET<sub>B</sub>R was generated using NCBI and the graphics was created on the ESPrict 3.0 server.  $\alpha$ -helices for ETRs are shown as columns underneath the sequences. Orange asterisks represent the binding-pocket residues of ET<sub>A</sub>R bound to ET-1, pink asterisks represent the binding-pocket residues of ET<sub>B</sub>R bound to ET-1 and cyan asterisks represent the binding-pocket residues of ET<sub>B</sub>R bound to IRL1620.

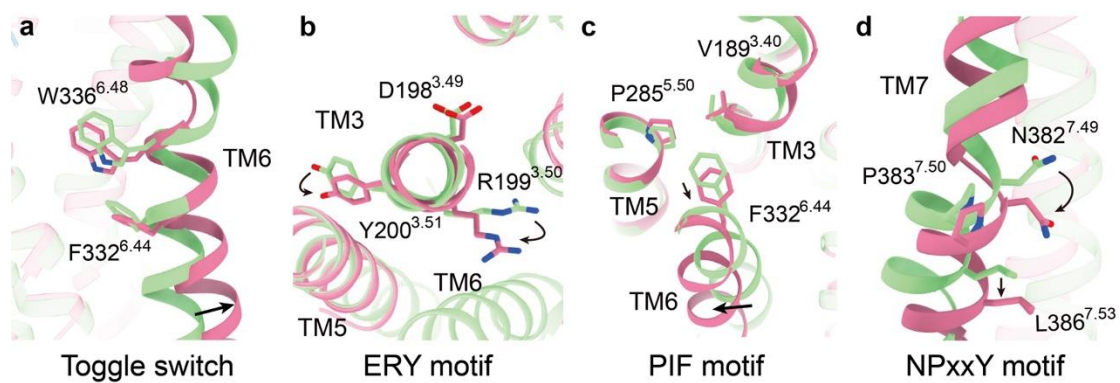

**Fig. S6 Conformational changes of the conserved “micro-switches” upon receptor activation.** Toggle switch (**a**), ERY motif (**b**), PIF motif (**c**), NPxxY motif (**d**). The outward movement of TM6 of the active receptor is highlighted as a black arrow (**a**). The conformational changes of residue side chains are highlighted as black arrows.



**Table S1. Cryo-EM data collection, model refinement, and validation statistics.**

|                                                  | ET-1-ET <sub>A</sub> R-G <sub>q</sub> -<br>scFv16<br>(EMDB-34663)<br>(PDB: 8HCQ) | ET-1-ET <sub>B</sub> R-G <sub>q</sub> -<br>scFv16<br>(EMDB-34667)<br>(PDB: 8HCX) | IRL1620-ET <sub>B</sub> R-<br>G <sub>i</sub> -scFv16<br>(EMDB-34619)<br>(PDB: 8HBD) |
|--------------------------------------------------|----------------------------------------------------------------------------------|----------------------------------------------------------------------------------|-------------------------------------------------------------------------------------|
| <b>Data collection and processing</b>            |                                                                                  |                                                                                  |                                                                                     |
| Magnification                                    | 105K                                                                             | 81K                                                                              | 81K                                                                                 |
| Voltage (kV)                                     | 300                                                                              | 300                                                                              | 300                                                                                 |
| Electron exposure (e-/Å <sup>2</sup> )           | 50                                                                               | 50                                                                               | 50                                                                                  |
| Defocus range (μm)                               | -0.8 ~ -1.8                                                                      | -0.8 ~ -2                                                                        | -0.8 ~ -2                                                                           |
| Pixel size (Å)                                   | 0.824                                                                            | 1.04                                                                             | 1.04                                                                                |
| Symmetry imposed                                 | C1                                                                               | C1                                                                               | C1                                                                                  |
| Initial particle images (no.)                    | 13,462,594                                                                       | 7,414,897                                                                        | 4,078,200                                                                           |
| Final particle images (no.)                      | 510,197                                                                          | 373,655                                                                          | 191,493                                                                             |
| Map resolution (Å)                               | 3.0                                                                              | 3.5                                                                              | 3.0                                                                                 |
| FSC threshold                                    | 0.143                                                                            | 0.143                                                                            | 0.142                                                                               |
| Map resolution range (Å)                         | 2.6-4.0                                                                          | 3.0-4.6                                                                          | 2.5-4.5                                                                             |
| <b>Refinement</b>                                |                                                                                  |                                                                                  |                                                                                     |
| Initial model used (PDB code)                    | None                                                                             | None                                                                             | None                                                                                |
| Model resolution (Å)                             | 3.4                                                                              | 4                                                                                | 3.4                                                                                 |
| FSC threshold                                    | 0.5                                                                              | 0.5                                                                              | 0.5                                                                                 |
| Map sharpening <i>B</i> factor (Å <sup>2</sup> ) | -106.707                                                                         | -131.676                                                                         | -90.3371                                                                            |
| Model composition                                |                                                                                  |                                                                                  |                                                                                     |
| Non-hydrogen atoms                               | 9013                                                                             | 8933                                                                             | 8826                                                                                |
| Protein residues                                 | 1157                                                                             | 1159                                                                             | 1158                                                                                |
| Ligands                                          | 0                                                                                | 0                                                                                | 0                                                                                   |
| <i>B</i> factors (Å <sup>2</sup> )               |                                                                                  |                                                                                  |                                                                                     |
| Protein                                          | 102.61                                                                           | 95.47                                                                            | 83.46                                                                               |
| Ligand                                           | 0                                                                                | 0                                                                                | 0                                                                                   |
| R.m.s. deviations                                |                                                                                  |                                                                                  |                                                                                     |
| Bond lengths (Å)                                 | 0.003                                                                            | 0.003                                                                            | 0.002                                                                               |
| Bond angles (°)                                  | 0.661                                                                            | 0.623                                                                            | 0.575                                                                               |
| Validation                                       |                                                                                  |                                                                                  |                                                                                     |
| MolProbity score                                 | 1.75                                                                             | 1.7                                                                              | 1.71                                                                                |
| Clashscore                                       | 9.15                                                                             | 10.83                                                                            | 10.70                                                                               |
| Poor rotamers (%)                                | 0.21                                                                             | 0.31                                                                             | 0.32                                                                                |
| Ramachandran plot                                |                                                                                  |                                                                                  |                                                                                     |
| Favored (%)                                      | 96.11                                                                            | 97.19                                                                            | 97.08                                                                               |
| Allowed (%)                                      | 3.8                                                                              | 2.46                                                                             | 2.83                                                                                |
| Disallowed (%)                                   | 0.09                                                                             | 0.35                                                                             | 0.09                                                                                |

**Table S2. Effects of ET-1 on ET<sub>A</sub>R/ET<sub>B</sub>R mutants.** NanoBiT assay was performed to evaluate the effects of ET1 on  $\beta$ -arrestin 2 of ET<sub>A</sub>R/ET<sub>B</sub>R. The surface expression of each ET<sub>A</sub>R/ET<sub>B</sub>R mutant was normalized to wild-type (WT) receptor, which was set to 100%. Data are presented as means  $\pm$  S.E.M. of three independent experiments in triplicate (n = 3). U.D., undetectable. Source data are provided as a Source Data file.

| Receptor          | Residue number | Mutant | $EC_{50}$ (nM)     | Fold of change   | Surface expression(% WT) |
|-------------------|----------------|--------|--------------------|------------------|--------------------------|
| ET <sub>A</sub> R | -              | WT     | 20.71 $\pm$ 0.56   | 1                | 100                      |
|                   | 2.61           | N137A  | U.D.               | -                | 87.85 $\pm$ 2.65         |
|                   | 2.64           | K140A  | U.D.               | -                | 88.94 $\pm$ 6.76         |
|                   | 3.29           | P162A  | >376.50            | >18.18           | 97.65 $\pm$ 6.94         |
|                   | 3.32           | Q165A  | > 161.07           | >7.78            | 63 $\pm$ 1.3             |
|                   | 3.33           | K166A  | U.D.               | -                | 126.09 $\pm$ 7.12        |
|                   | ECL2           | F229A  | >657.60            | >31.75           | 105.28 $\pm$ 7.64        |
|                   | ECL2           | Y231A  | U.D.               | -                | 64.39 $\pm$ 7.04         |
|                   | ECL2           | R232A  | U.D.               | -                | 80.72 $\pm$ 8.26         |
|                   | ECL2           | H236A  | 60.92 $\pm$ 8.39   | 2.94             | 91.01 $\pm$ 8.39         |
|                   | ECL2           | T238A  | U.D.               | -                | 55.85 $\pm$ 5.13         |
|                   | ECL2           | M240A  | U.D.               | -                | 72.84 $\pm$ 4.46         |
|                   | 5.42           | L259A  | 190.73 $\pm$ 11.26 | 9.21             | 60.26 $\pm$ 9.19         |
|                   | 6.48           | W319A  | 5.89 $\pm$ 0.83    | 0.28             | 108.92 $\pm$ 2.68        |
|                   | 6.55           | R326A  | >424.17            | >20.48           | 60.86 $\pm$ 8.38         |
|                   | 6.58           | K329A  | U.D.               | -                | 88.41 $\pm$ 5.28         |
|                   | 7.28           | L344A  | 127.96 $\pm$ 17.23 | 6.18             | 100.89 $\pm$ 8.23        |
|                   | 7.31           | L347A  | U.D.               | -                | 69.16 $\pm$ 3.76         |
|                   | 7.32           | L348A  | U.D.               | -                | 70.72 $\pm$ 0.43         |
|                   | 7.35           | D351A  | U.D.               | -                | 106.9 $\pm$ 2.04         |
| 7.36              | Y352A          | U.D.   | -                  | 80.24 $\pm$ 6.83 |                          |
| 7.39              | I355A          | U.D.   | -                  | 54.53 $\pm$ 6.4  |                          |
| ET <sub>B</sub> R | -              | WT     | 2.50 $\pm$ 0.20    | 1                | 100                      |
|                   | 1.28           | K97A   | 1.68 $\pm$ 0.33    | 0.67             | 85.63 $\pm$ 2.04         |
|                   | 2.40           | N137A  | 2.79 $\pm$ 0.88    | 1.12             | 50.48 $\pm$ 4.73         |
|                   | 6.48           | W336A  | 5.55 $\pm$ 0.58    | 2.22             | 71.82 $\pm$ 4.97         |
|                   | 7.39           | I372A  | 2.12 $\pm$ 0.34    | 0.85             | 111.70 $\pm$ 5.32        |
|                   | 8.47           | S390A  | 2.57 $\pm$ 0.48    | 1.03             | 110.75 $\pm$ 3.33        |

**Table S3. List of primers sequences for site-direct mutagenesis studies.**

| Receptor               | primers                 | Forward                    | Reverse                    |
|------------------------|-------------------------|----------------------------|----------------------------|
| <b>ET<sub>A</sub>R</b> | N137 <sup>2.61</sup> A  | CTATCGCTGTATTTAAGCTGCTG    | AATACAGCGATAGGGAGATCAAT    |
|                        | K140 <sup>2.64</sup> A  | TATTTGCTCTGCTGGCTGGGCGC    | AGCAGAGCAAATACATTGATAGG    |
|                        | P162 <sup>3.29</sup> A  | TGTTTCGCTTTTTTGCAGAAGTCCT  | AAAAAAGCGAACAGCTTGCAAAG    |
|                        | Q165 <sup>3.32</sup> A  | TTTTGGCTAAGTCTCGGTGGGG     | GACTTAGCCAAAAAGGGGAACAG    |
|                        | K166 <sup>3.33</sup> A  | TGCAGGCTTCCTCGGTGGGGATC    | GAGGAAGCCTGCAAAAAGGGGAA    |
|                        | F229 <sup>ECL2</sup> A  | TACCCGCTGAATATAGGGGTGAA    | TATTCAGCGGGTACCATGACGAA    |
|                        | Y231 <sup>ECL2</sup> A  | TTGAAGCTAGGGGTGAACAGCAT    | CCCCTAGCTTCAAAGGGTACCAT    |
|                        | R232 <sup>ECL2</sup> A  | AATATGCTGGTGAACAGCATAAA    | TCACCAGCATATTCAAAGGGTAC    |
|                        | H236 <sup>ECL2</sup> A  | AACAGGCTAAAACCTGTATGCTC    | GTTTTAGCTGTTACCCCTATA      |
|                        | T238 <sup>ECL2</sup> A  | ATAAAGCTTGTATGCTCAATGCC    | ATACAAGCTTTATGCTGTTACC     |
|                        | M240 <sup>ECL2</sup> A  | CCTGTGCTCTCAATGCCACATCA    | TTGAGAGCACAGGTTTTATGCTG    |
|                        | L259 <sup>5.42</sup> A  | GGTGGCTTTCGGGTTCTATTTT     | CCGAAAGCCACCAGTCCTTTTAC    |
|                        | W319 <sup>6.48</sup> A  | TTTGCCTTTCCCTCTTCATTTA     | GGGAAAGCGCAAAGAGCAAAAAT    |
|                        | R326 <sup>6.55</sup> A  | TAAGCGCTATATTGAAGAAAAC     | AATATAGCGCTTAAATGAAGAGG    |
|                        | K329 <sup>6.58</sup> A  | TATTGGCTAAAACGTGTATAAC     | GTTTTAGCCAATATACGGCTTAA    |
|                        | L344 <sup>7.28</sup> A  | AATTAGCTAGTTTCTTACTGCTC    | AAACTAGCTAATTCACATCGGTT    |
|                        | L347 <sup>7.31</sup> A  | GTTTCGCTCTGCTCATGGATTAC    | AGCAGAGCGAAACTAAGTAATTC    |
|                        | L348 <sup>7.32</sup> A  | TCTTAGCTCTCATGGATTACATC    | ATGAGAGCTAAGAACTAAGTAA     |
|                        | D351 <sup>7.35</sup> A  | TCATGGCTTACATCGGTATTAAC    | ATGTAAGCCATGAGCAGTAAGAA    |
|                        | Y352 <sup>7.36</sup> A  | TGGATGCTATCGGTATTAAC       | CCGATAGCATCCATGAGCAGTAA    |
| I355 <sup>7.39</sup> A | TCGGTGCTAACTTGGCAACCATG | AAGTTAGCACCGATGTAATCCAT    |                            |
| <b>ET<sub>B</sub>R</b> | K97 <sup>1.28</sup> A   | AAATCGCAGAGACCTTCAAGTAC    | AGGTCTCTGCGATTCGATAGGACC   |
|                        | N137 <sup>2.40</sup> A  | GTCCTGCTATCCTGATCGCTTCTTTG | TCAGGATAGCAGGACCGTTACGCATG |
|                        | W336 <sup>6.48</sup> A  | TCTGTGCTTTGCCTTTGCACTTG    | AAGGCAAAGCACAGAGAGCGAACAC  |
|                        | I372 <sup>7.39</sup> A  | TCGGAGCTAACATGGCTTCCCTG    | CCATGTTAGCTCCGATGTAGTCCAG  |
|                        | S390 <sup>8.47</sup> A  | TGGTGGCTAAGCGCTTCAAGAATTG  | AGCGCTTAGCCACCAGGTACAAAGC  |
